# Supplementary material
Source: publisher site journal article supplement (https://www.dovepress.com/get_supplementary_file.php?f=320839.docx)
Supplement: Supplementary file 1 [file get_supplementary_file.php]

**
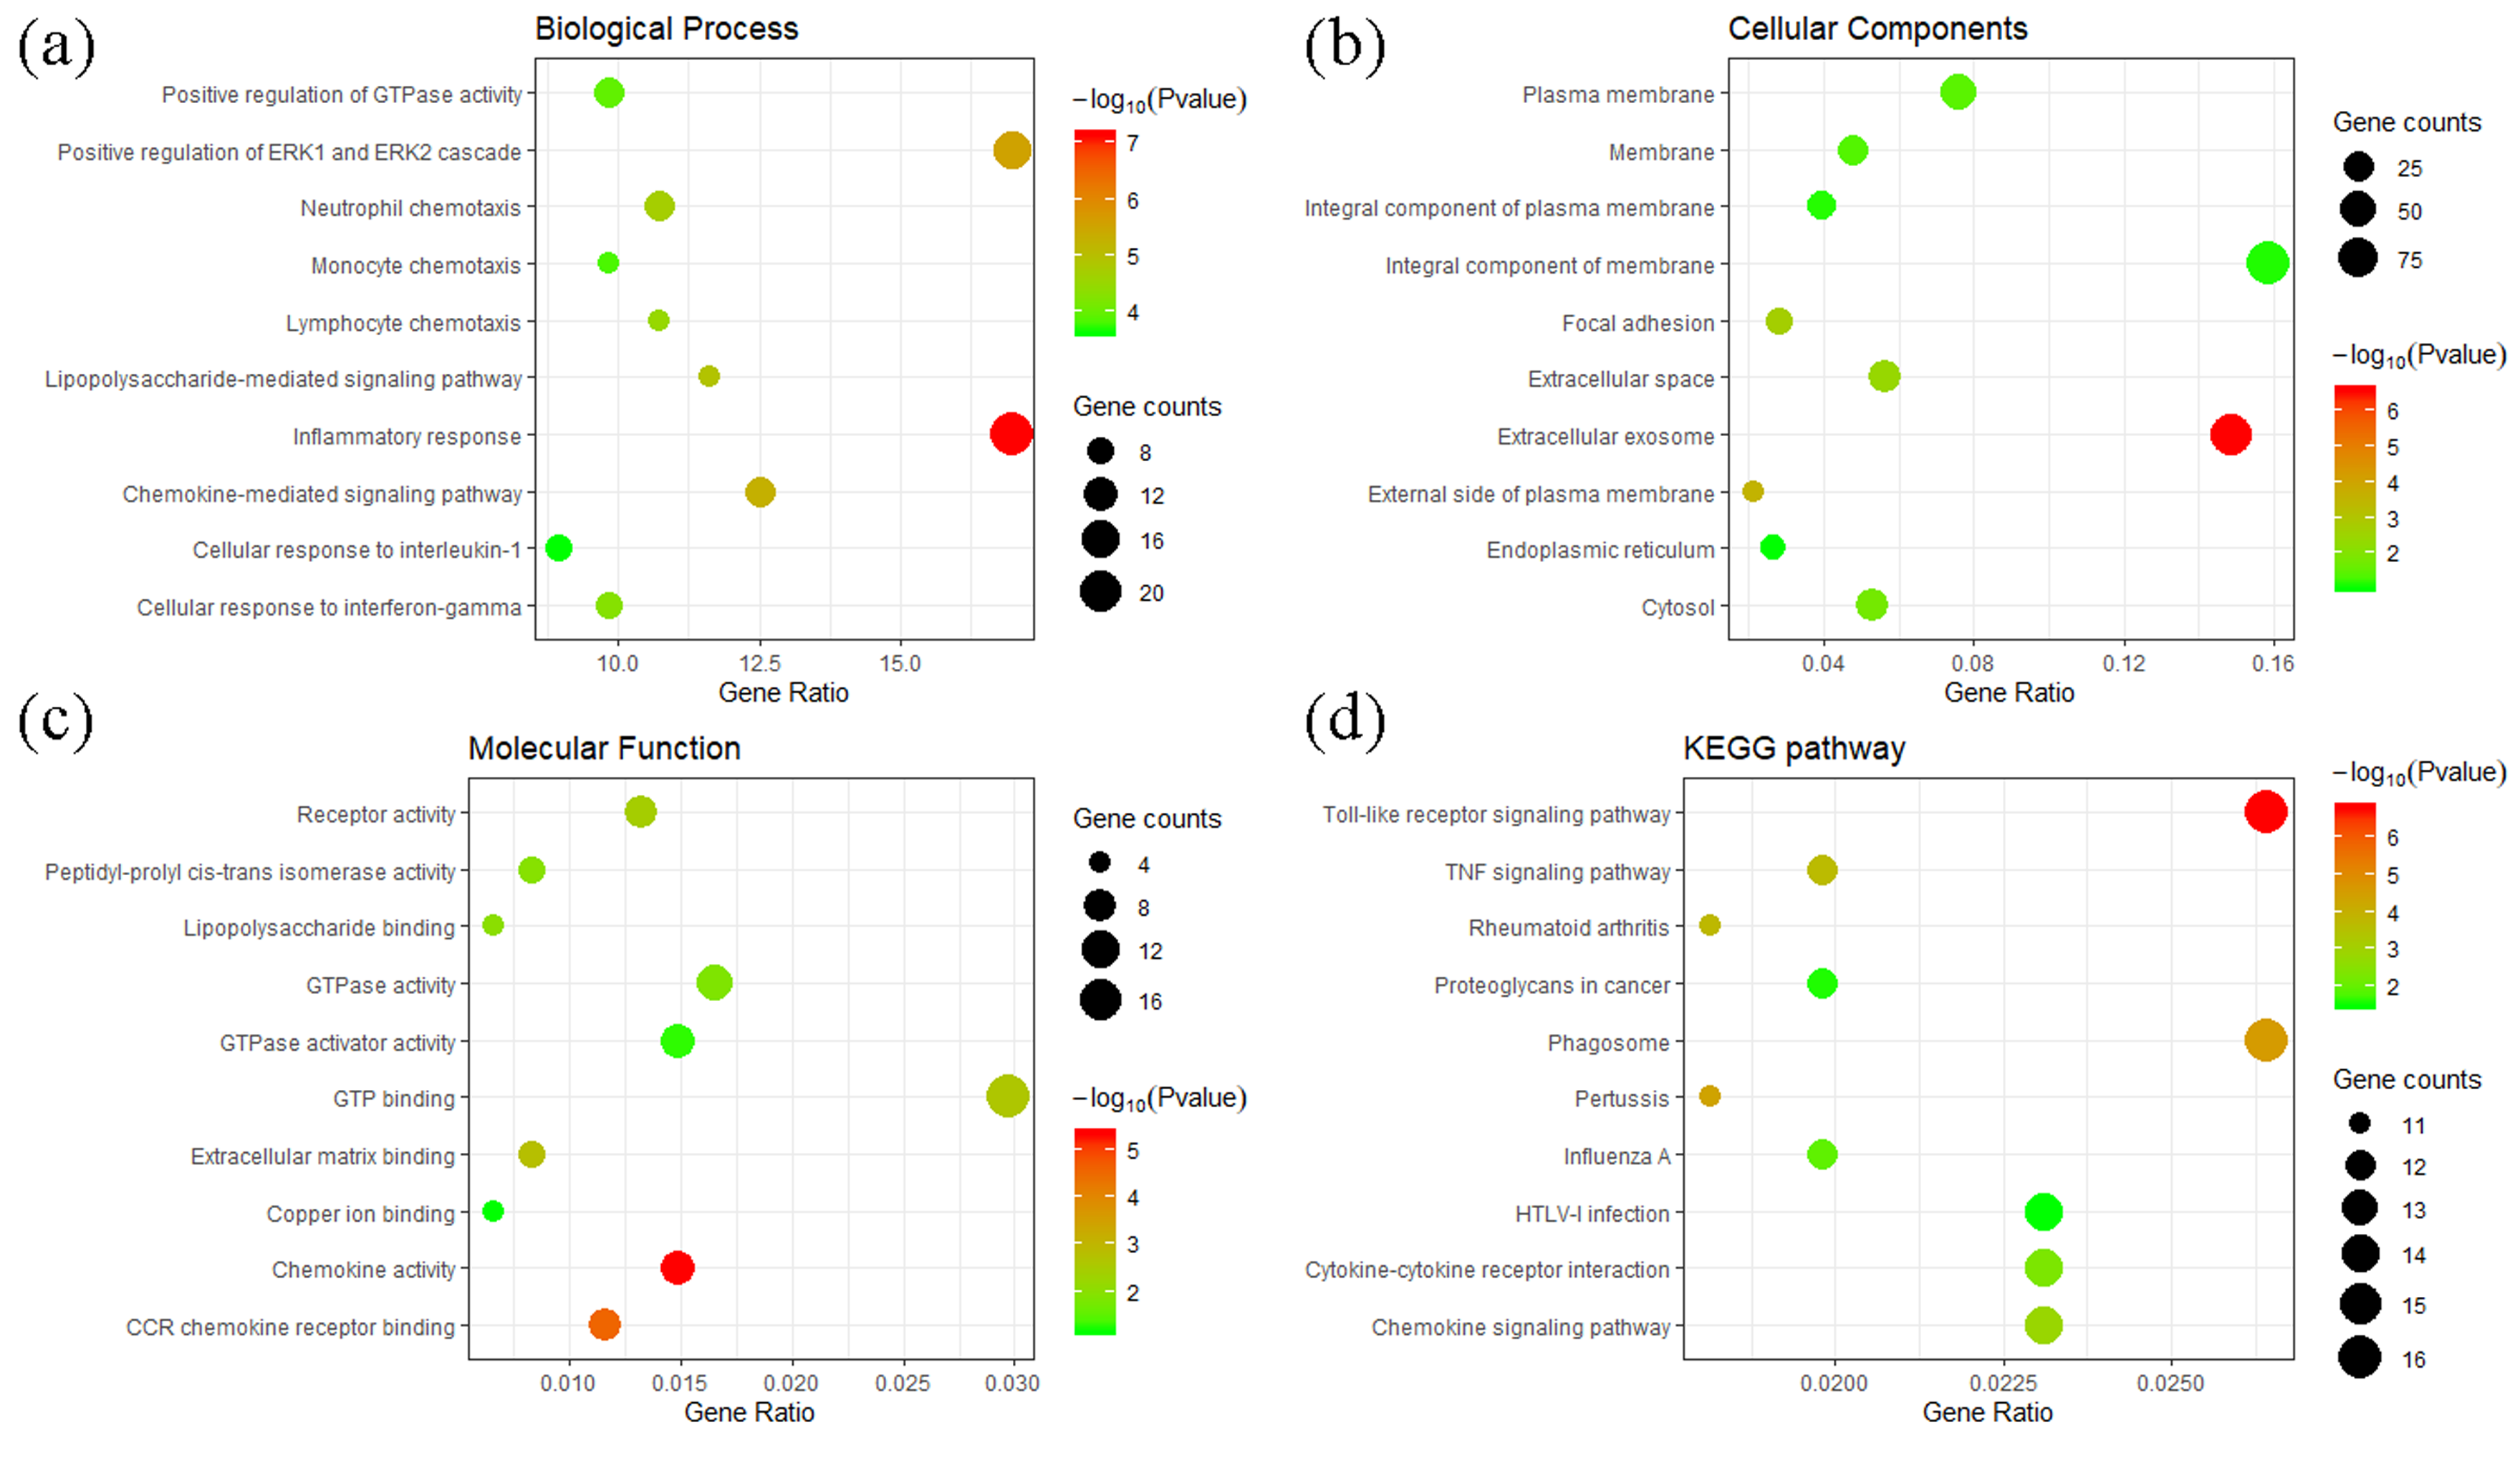
**

**Supplementary Figure 1.** GO including biological process (a), cellular components (b) and molecular function (c), and KEGG (d) enrichment analysis of the DEGs between the UHMWPE group and the control group. DEGs, differentially expressed genes; GO, gene ontology; KEGG, Kyoto Encyclopedia of Gene and Genome.

**Supplementary Table 1.** Differentially expressed genes from the comparison of UHMWPE and control group

| GENE | logFC | AveExpr | t | P.Value | adj.P.Val | B | Trend |
| --- | --- | --- | --- | --- | --- | --- | --- |
| PFN1 | 513.1944074 | 701.4949321 | 35.77149939 | 4.77E-09 | 8.63E-06 | 8.532586708 | UP |
| SPP1 | 439.1923087 | 1692.390313 | 9.732733626 | 2.93E-05 | 0.002141424 | 3.145381891 | UP |
| RPS11 | 395.5265741 | 653.6366296 | 4.984639959 | 0.001694498 | 0.035647516 | -0.878469028 | UP |
| GAPDH | 251.0648149 | 2104.267901 | 6.750457275 | 0.000290826 | 0.010523261 | 0.925780627 | UP |
| APOC1 | 233.2438889 | 851.5492407 | 7.330755259 | 0.000175694 | 0.007357993 | 1.429189444 | UP |
| CCL3 | 232.45225 | 325.9798056 | 10.11756562 | 2.28E-05 | 0.001828972 | 3.374501558 | UP |
| CXCL9 | 115.9248827 | 161.5685329 | 19.7483949 | 2.70E-07 | 8.16E-05 | 6.772424508 | UP |
| CCL4 | 115.0869389 | 154.1589315 | 45.12817511 | 9.76E-10 | 2.94E-06 | 8.917888888 | UP |
| WARS | 75.12625049 | 95.89923327 | 6.176591721 | 0.000495243 | 0.015342358 | 0.386968093 | UP |
| TAGLN2 | 72.77056234 | 285.9557261 | 6.51015025 | 0.000361883 | 0.012260643 | 0.705327044 | UP |
| IL1RN | 70.69025803 | 163.3384005 | 34.46050034 | 6.15E-09 | 9.28E-06 | 8.456945262 | UP |
| CCL24 | 66.40543889 | 110.4920163 | 11.98596012 | 7.56E-06 | 0.0008181 | 4.346210855 | UP |
| SLAMF7 | 63.03401852 | 281.3489907 | 5.31612943 | 0.001181744 | 0.027984433 | -0.505448674 | UP |
| EMP1 | 55.26069136 | 295.0367346 | 6.167516645 | 0.000499575 | 0.015423738 | 0.378099796 | UP |
| CCL22 | 54.72963827 | 174.8518309 | 22.07767084 | 1.27E-07 | 5.22E-05 | 7.199126122 | UP |
| ALDOA | 52.8172784 | 242.2003029 | 6.65312382 | 0.000317519 | 0.011229908 | 0.837365085 | UP |
| ITGA5 | 49.1977929 | 91.64901265 | 13.32249344 | 3.76E-06 | 0.000505872 | 4.921365949 | UP |
| MMP14 | 48.83749753 | 220.6218702 | 9.807420001 | 2.79E-05 | 0.002071442 | 3.190711732 | UP |
| PLAUR | 48.60869969 | 104.274245 | 15.6274894 | 1.30E-06 | 0.000244965 | 5.732149028 | UP |
| NUPR1 | 48.40293975 | 73.27062848 | 4.812247222 | 0.002056065 | 0.040257923 | -1.079190545 | UP |
| CXCL5 | 45.40979815 | 143.2820397 | 8.344450277 | 7.83E-05 | 0.00429372 | 2.219516598 | UP |
| PILRA | 44.14991759 | 69.35718344 | 5.424700345 | 0.001053528 | 0.026603224 | -0.386910607 | UP |
| CYP27A1 | 40.5024537 | 187.0082335 | 4.903419537 | 0.001855192 | 0.037809226 | -0.972456408 | UP |
| IL4I1 | 40.08886574 | 52.14608422 | 10.84940825 | 1.45E-05 | 0.001287321 | 3.781348517 | UP |
| RGS1 | 37.78878761 | 64.74284628 | 13.09300332 | 4.22E-06 | 0.000530234 | 4.828745597 | UP |
| IDO1 | 33.7644287 | 58.25340494 | 27.38631113 | 2.94E-08 | 1.90E-05 | 7.894184184 | UP |
| GLA | 33.22031358 | 170.3528088 | 7.365122191 | 0.000170699 | 0.00728368 | 1.457776287 | UP |
| CYP27B1 | 31.45385463 | 48.641818 | 13.90491847 | 2.83E-06 | 0.00041557 | 5.145993721 | UP |
| GPR183 | 31.36796667 | 83.9735428 | 8.925894805 | 5.11E-05 | 0.003209881 | 2.627441923 | UP |
| ICAM1 | 29.64225123 | 112.4773628 | 23.6930645 | 7.87E-08 | 3.39E-05 | 7.445622086 | UP |
| PPIF | 28.95791852 | 75.91232798 | 7.138423104 | 0.000206889 | 0.008309993 | 1.266726645 | UP |
| CEBPB | 28.47700309 | 73.84127798 | 4.789764033 | 0.002109238 | 0.041115213 | -1.105712141 | UP |
| IL1B | 26.93613056 | 83.94138035 | 10.29555691 | 2.04E-05 | 0.001648192 | 3.476832816 | UP |
| NDRG1 | 26.77411728 | 48.7380375 | 6.202892432 | 0.000482925 | 0.015124134 | 0.412606719 | UP |
| TAP1 | 25.93031111 | 130.9093926 | 9.993259758 | 2.47E-05 | 0.001929956 | 3.301688268 | UP |
| INSIG1 | 22.38750685 | 41.60410759 | 26.61020699 | 3.58E-08 | 2.16E-05 | 7.811174159 | UP |
| HMG20B | 22.33813086 | 68.99351646 | 4.832422736 | 0.002009614 | 0.039581988 | -1.05545886 | UP |
| MMP19 | 22.08827963 | 78.9109749 | 7.650280128 | 0.000134919 | 0.0063237 | 1.689936869 | UP |
| ADM | 21.30968827 | 38.69463169 | 10.39403916 | 1.92E-05 | 0.001594669 | 3.532496526 | UP |
| GPC4 | 20.86697469 | 75.54162099 | 11.37249904 | 1.07E-05 | 0.001038003 | 4.050815676 | UP |
| PPP1R15A | 19.08504568 | 53.66489856 | 28.20619151 | 2.41E-08 | 1.78E-05 | 7.976334793 | UP |
| ATF5 | 18.70789478 | 47.42004742 | 5.628087281 | 0.000853078 | 0.022696902 | -0.169570612 | UP |
| ATF4 | 18.70380787 | 60.49111301 | 17.1479366 | 6.98E-07 | 0.000153812 | 6.167417669 | UP |
| ANKRD13A | 18.68194253 | 11.8122923 | 14.03222477 | 2.67E-06 | 0.000401826 | 5.193183732 | UP |
| NPC1 | 16.89186852 | 57.58911358 | 16.2309894 | 1.01E-06 | 0.000201057 | 5.913221634 | UP |
| SH3BP5 | 16.42310988 | 54.44948128 | 30.03177417 | 1.57E-08 | 1.58E-05 | 8.141016646 | UP |
| PSMB9 | 16.22181631 | 79.89547872 | 4.73155792 | 0.002254128 | 0.042658664 | -1.174743427 | UP |
| ENO2 | 16.20672593 | 32.9731537 | 4.937969431 | 0.001784851 | 0.036862475 | -0.932349753 | UP |
| SLC7A11 | 15.72700864 | 76.90219959 | 5.93091762 | 0.000629028 | 0.018302821 | 0.142915436 | UP |
| DDIT4 | 15.65119284 | 36.22432313 | 15.0581548 | 1.67E-06 | 0.000293522 | 5.550365374 | UP |
| TMEM140 | 15.56621451 | 39.27039907 | 7.390417273 | 0.000167125 | 0.00719909 | 1.478732433 | UP |
| ALAS1 | 15.09114753 | 73.43574997 | 8.866809112 | 5.33E-05 | 0.003325457 | 2.587376871 | UP |
| SOCS3 | 15.03952617 | 20.95538119 | 27.95080669 | 2.56E-08 | 1.78E-05 | 7.951328691 | UP |
| G0S2 | 14.98980355 | 9.435183273 | 16.49064544 | 9.07E-07 | 0.000190784 | 5.987670772 | UP |
| JUN | 14.79904037 | 47.37384704 | 4.970964139 | 0.001720436 | 0.036025609 | -0.894222469 | UP |
| SDS | 14.65778438 | 24.287552 | 16.19824718 | 1.02E-06 | 0.000201057 | 5.903689641 | UP |
| TMBIM1 | 14.6479037 | 138.2970346 | 6.085646606 | 0.000540639 | 0.01624792 | 0.297589641 | UP |
| P2RX4 | 14.50223438 | 32.54505093 | 7.821014729 | 0.000117593 | 0.005836561 | 1.824750164 | UP |
| TBC1D2 | 14.42766636 | 20.12915088 | 5.019961579 | 0.001629498 | 0.034683379 | -0.837916012 | UP |
| SLC2A1 | 14.37812074 | 18.00888082 | 20.07920789 | 2.41E-07 | 8.08E-05 | 6.838900943 | UP |
| FGR | 14.07073241 | 66.14235998 | 10.31312659 | 2.02E-05 | 0.001644755 | 3.486812883 | UP |
| ZBTB1 | 13.92736612 | 9.561635984 | 5.924839651 | 0.000632817 | 0.01834763 | 0.136771689 | UP |
| TNF | 13.61904889 | 37.45929379 | 15.07936051 | 1.65E-06 | 0.000293522 | 5.55733677 | UP |
| IGF2R | 12.84494444 | 128.6047728 | 6.15975262 | 0.000503315 | 0.015433854 | 0.370503832 | UP |
| GCHFR | 12.65560352 | 29.15167117 | 6.523087986 | 0.000357593 | 0.012160864 | 0.717382444 | UP |
| PTPN1 | 12.5105242 | 30.85634523 | 9.355650434 | 3.78E-05 | 0.002573202 | 2.909907461 | UP |
| F3 | 11.91071281 | 49.51228791 | 4.78799598 | 0.002113484 | 0.041115213 | -1.107801148 | UP |
| RSAD2 | 11.29036347 | 13.07651059 | 25.4927477 | 4.79E-08 | 2.71E-05 | 7.681810816 | UP |
| TUBA4A | 11.13596235 | 47.07149733 | 10.75117961 | 1.54E-05 | 0.001339623 | 3.728827242 | UP |
| FLOT2 | 10.93873531 | 18.32779214 | 4.57776571 | 0.00269298 | 0.048239005 | -1.359716162 | UP |
| VDAC1 | 10.45681389 | 35.20260714 | 7.938557529 | 0.000107128 | 0.005413879 | 1.915795271 | UP |
| OGFR | 10.44415722 | 21.84944842 | 4.831026047 | 0.002012792 | 0.039581988 | -1.057099669 | UP |
| UAP1L1 | 10.19869556 | 9.208029625 | 4.887069269 | 0.001889549 | 0.037871976 | -0.991501459 | UP |
| GSTO1 | 10.08997319 | 82.16220461 | 7.71073646 | 0.000128473 | 0.006181738 | 1.738025757 | UP |
| CD300LF | 9.83157395 | 24.46797171 | 4.648339923 | 0.00248083 | 0.045986855 | -1.274368255 | UP |
| PTGS2 | 9.591665747 | 7.986681438 | 30.12934997 | 1.54E-08 | 1.58E-05 | 8.149172208 | UP |
| WIPI1 | 9.543234259 | 28.84131866 | 4.89405186 | 0.00187479 | 0.037858757 | -0.983362903 | UP |
| RHOC | 9.360622222 | 41.60119588 | 6.577762624 | 0.000340088 | 0.011775558 | 0.768091823 | UP |
| IRF1 | 9.055300617 | 60.20944033 | 4.564306381 | 0.002735679 | 0.048618767 | -1.376082707 | UP |
| SDC4 | 8.889881543 | 29.44124854 | 9.334305725 | 3.84E-05 | 0.002575991 | 2.896240201 | UP |
| ADCY3 | 8.884437531 | 22.65592735 | 5.36880787 | 0.001117478 | 0.027265552 | -0.447713068 | UP |
| OLR1 | 8.711731367 | 15.22208471 | 14.60126286 | 2.05E-06 | 0.000324638 | 5.396217384 | UP |
| TAPBP | 8.477784938 | 23.88389539 | 7.735643701 | 0.000125919 | 0.006091266 | 1.757724949 | UP |
| QPCT | 8.445978703 | 50.76964025 | 17.81168643 | 5.41E-07 | 0.000132157 | 6.337068469 | UP |
| ST3GAL6 | 8.423225926 | 25.83566043 | 4.703727892 | 0.002327279 | 0.04383827 | -1.207938345 | UP |
| USP12 | 8.342240741 | 28.92106183 | 9.366284763 | 3.76E-05 | 0.002573202 | 2.916702951 | UP |
| DUSP5 | 8.307889259 | 17.91389967 | 14.82296685 | 1.85E-06 | 0.000304285 | 5.471969029 | UP |
| OSM | 8.215662142 | 5.7550625 | 7.664712581 | 0.000133347 | 0.006282602 | 1.701452284 | UP |
| SLC30A5 | 8.185049506 | 6.349538807 | 5.174663835 | 0.001375715 | 0.03074946 | -0.662575886 | UP |
| LONP1 | 8.053676914 | 26.29374753 | 4.949886412 | 0.001761281 | 0.036626554 | -0.918559399 | UP |
| EGR2 | 7.738254444 | 32.97357733 | 17.1671666 | 6.92E-07 | 0.000153812 | 6.172495673 | UP |
| EREG | 7.683979952 | 6.975928462 | 9.967279373 | 2.52E-05 | 0.001937948 | 3.286327658 | UP |
| KLHL6 | 7.523532407 | 20.97937053 | 8.506189794 | 6.94E-05 | 0.003971858 | 2.336101106 | UP |
| DENND2D | 7.446264691 | 43.69426218 | 5.299481408 | 0.001202904 | 0.028411141 | -0.523781984 | UP |
| CD300LB | 7.168812346 | 18.83822292 | 4.857317424 | 0.001953897 | 0.038903761 | -1.026264389 | UP |
| NRIP3 | 7.139053086 | 25.66272819 | 9.726980892 | 2.95E-05 | 0.002141424 | 3.141872747 | UP |
| SERTAD1 | 7.117607099 | 30.16792021 | 6.151329108 | 0.000507408 | 0.015486534 | 0.36225342 | UP |
| HCAR2 | 6.908734481 | 16.38591248 | 18.25499314 | 4.58E-07 | 0.000118412 | 6.444207433 | UP |
| SLCO4A1 | 6.816557778 | 8.484874477 | 9.039531517 | 4.71E-05 | 0.00298182 | 2.70364726 | UP |
| MGAT1 | 6.790930247 | 33.98308535 | 5.39444953 | 0.001087617 | 0.026881367 | -0.419760779 | UP |
| NUMB | 6.765162346 | 35.39635169 | 12.03055407 | 7.38E-06 | 0.000813837 | 4.36686513 | UP |
| TICAM1 | 6.733446018 | 7.981983981 | 8.028443422 | 9.98E-05 | 0.005160654 | 1.984465528 | UP |
| CHMP4B | 6.733306173 | 83.40614074 | 10.51163072 | 1.78E-05 | 0.001507625 | 3.598086937 | UP |
| SRC | 6.556062407 | 25.80601039 | 5.368436789 | 0.001117917 | 0.027265552 | -0.448118313 | UP |
| UPP1 | 6.489917507 | 12.57130484 | 6.483746468 | 0.000370818 | 0.01251648 | 0.680657176 | UP |
| MYO1E | 6.434066358 | 60.90273796 | 7.815904203 | 0.000118073 | 0.005836561 | 1.820759304 | UP |
| IL3RA | 6.321252778 | 9.681466267 | 19.79566464 | 2.65E-07 | 8.16E-05 | 6.782053269 | UP |
| CCL20 | 6.242661737 | 3.551718367 | 24.34162763 | 6.55E-08 | 3.03E-05 | 7.535027729 | UP |
| GZMB | 6.073053086 | 17.20402936 | 6.574655367 | 0.000341056 | 0.011775558 | 0.765220137 | UP |
| PHLDA1 | 6.054234938 | 18.4426451 | 18.44784621 | 4.27E-07 | 0.000113569 | 6.48935532 | UP |
| NEU1 | 5.86418642 | 61.12021235 | 5.368186633 | 0.001118213 | 0.027265552 | -0.448391511 | UP |
| CEP350 | 5.826710123 | 5.058930391 | 4.606960395 | 0.002602875 | 0.047280328 | -1.324314206 | UP |
| GEM | 5.634220957 | 5.173788706 | 9.845352159 | 2.72E-05 | 0.002037203 | 3.213572625 | UP |
| LITAF | 5.534216914 | 43.10155979 | 7.099594334 | 0.00021392 | 0.008413577 | 1.233410404 | UP |
| DOT1L | 5.455688611 | 11.77212798 | 5.557406999 | 0.000917449 | 0.024055769 | -0.244408784 | UP |
| PPP1R15B | 5.358532778 | 21.71258218 | 12.30328391 | 6.36E-06 | 0.000719719 | 4.490876514 | UP |
| CD72 | 5.326365494 | 3.204187942 | 19.73913968 | 2.71E-07 | 8.16E-05 | 6.770534094 | UP |
| ITGB3 | 5.296039466 | 3.762495028 | 6.663027719 | 0.00031468 | 0.011207086 | 0.84641567 | UP |
| ATP8B4 | 5.293594861 | 3.569206989 | 7.159261355 | 0.000203224 | 0.008206976 | 1.284534117 | UP |
| NANS | 5.272652469 | 46.74925658 | 5.211868622 | 0.001321469 | 0.030263301 | -0.620956718 | UP |
| SECISBP2 | 5.272355833 | 10.12649927 | 13.19162091 | 4.02E-06 | 0.000518949 | 4.868841152 | UP |
| EGLN3 | 5.245578148 | 10.8020115 | 6.149183328 | 0.000508457 | 0.015486534 | 0.360150197 | UP |
| PRKX | 5.083942193 | 5.240868495 | 5.512222381 | 0.000961441 | 0.024920327 | -0.292635814 | UP |
| ITPRIP | 4.906900309 | 17.74418545 | 4.622023708 | 0.002557693 | 0.046979101 | -1.306101053 | UP |
| SFXN3 | 4.821237469 | 37.51325093 | 4.626071473 | 0.002545701 | 0.046979101 | -1.301213006 | UP |
| TBC1D8 | 4.784169753 | 19.50281382 | 14.15492484 | 2.52E-06 | 0.000385648 | 5.238042505 | UP |
| SLC1A5 | 4.78141679 | 15.72466564 | 15.13672402 | 1.61E-06 | 0.000293522 | 5.576115608 | UP |
| CP | 4.754727716 | 7.063760494 | 11.41975945 | 1.04E-05 | 0.00103321 | 4.074341846 | UP |
| SIRPA | 4.573077778 | 60.66069815 | 6.647838538 | 0.000319046 | 0.011229908 | 0.832530137 | UP |
| SMG5 | 4.532458025 | 19.97701889 | 5.254623865 | 0.001262055 | 0.029424087 | -0.573389447 | UP |
| CKS2 | 4.494583951 | 28.18179918 | 6.374503408 | 0.00041052 | 0.013454926 | 0.577627976 | UP |
| SUN2 | 4.485862654 | 14.7999775 | 7.057255446 | 0.000221896 | 0.008652031 | 1.196881252 | UP |
| CHMP1B | 4.449624691 | 25.18534848 | 6.909851803 | 0.000252399 | 0.009553157 | 1.068047165 | UP |
| SLC16A10 | 4.39618779 | 5.212488403 | 10.91581861 | 1.39E-05 | 0.001274571 | 3.816505293 | UP |
| PFKP | 4.341181913 | 18.35856805 | 5.264239064 | 0.001249107 | 0.029349155 | -0.562730393 | UP |
| TSC22D1 | 4.340030864 | 44.03895984 | 4.660213895 | 0.002446989 | 0.045452702 | -1.260086228 | UP |
| TM4SF1 | 4.140672033 | 4.32596675 | 17.08854625 | 7.14E-07 | 0.000153812 | 6.151671402 | UP |
| PPME1 | 4.136371451 | 14.90888087 | 14.53810911 | 2.11E-06 | 0.000328389 | 5.374302818 | UP |
| GADD45B | 4.04609895 | 11.34798298 | 8.586348091 | 6.54E-05 | 0.003840094 | 2.392975072 | UP |
| AKIRIN2 | 3.950827407 | 25.75502889 | 4.890012719 | 0.001883312 | 0.037858757 | -0.98806979 | UP |
| SLC2A5 | 3.827337002 | 8.931122111 | 5.617453536 | 0.000862431 | 0.022878458 | -0.18078323 | UP |
| TAP2 | 3.74331142 | 18.40724397 | 5.362033537 | 0.00112552 | 0.02729612 | -0.455114335 | UP |
| RHOF | 3.731491358 | 14.48651226 | 5.137071929 | 0.001433061 | 0.031562911 | -0.704843502 | UP |
| MYO1G | 3.637856451 | 15.07117478 | 5.884150875 | 0.000658853 | 0.018920571 | 0.095509057 | UP |
| ADRM1 | 3.457360741 | 19.70754626 | 6.011011075 | 0.000581402 | 0.017243812 | 0.223394329 | UP |
| RHBDD2 | 3.450507191 | 10.61851 | 4.954982744 | 0.001751307 | 0.036503058 | -0.91266868 | UP |
| P4HA1 | 3.395707346 | 14.18523029 | 8.27636618 | 8.25E-05 | 0.004494044 | 2.169697351 | UP |
| RIOK3 | 3.333892253 | 28.55570606 | 6.213939226 | 0.000477854 | 0.015124134 | 0.423347634 | UP |
| FDX1 | 3.330809753 | 19.0648863 | 5.764012996 | 0.00074301 | 0.02055434 | -0.027689109 | UP |
| LAT | 3.328485648 | 8.624527397 | 4.68728912 | 0.002371723 | 0.044420469 | -1.227603617 | UP |
| GIPC3 | 3.310214512 | 4.503136585 | 6.061061424 | 0.000553701 | 0.01653063 | 0.273234121 | UP |
| DUSP3 | 3.263696543 | 31.19179936 | 7.641257854 | 0.000135912 | 0.006337404 | 1.68272683 | UP |
| CD40 | 3.237151852 | 23.60588045 | 9.13008499 | 4.42E-05 | 0.002857874 | 2.763583483 | UP |
| PSMB8 | 3.139992593 | 53.77384918 | 5.419717998 | 0.001059059 | 0.026603224 | -0.392311661 | UP |
| ARL8A | 3.107207716 | 22.51369938 | 5.368171393 | 0.001118231 | 0.027265552 | -0.448408155 | UP |
| RRAD | 2.962660379 | 3.031919848 | 9.493668422 | 3.44E-05 | 0.002420001 | 2.997395968 | UP |
| AMPD3 | 2.857181975 | 8.262210535 | 4.564391219 | 0.002735408 | 0.048618767 | -1.375979454 | UP |
| SMOX | 2.853346667 | 3.621077776 | 9.598320354 | 3.21E-05 | 0.0023043 | 3.062725229 | UP |
| SLAMF9 | 2.75172838 | 5.307240911 | 6.76292709 | 0.000287593 | 0.010490194 | 0.937022824 | UP |
| IRAK1 | 2.696977897 | 8.402290557 | 5.158931821 | 0.001399397 | 0.030950962 | -0.680238272 | UP |
| NPR1 | 2.651452414 | 2.87499257 | 4.95973276 | 0.001742068 | 0.036394333 | -0.907181908 | UP |
| NUP98 | 2.643623667 | 5.9727585 | 4.99482008 | 0.001675473 | 0.035329441 | -0.866761254 | UP |
| ANKRD1 | 2.628086228 | 2.260663955 | 8.62112235 | 6.37E-05 | 0.003792234 | 2.417464283 | UP |
| PARVB | 2.605402593 | 16.01167825 | 7.558459978 | 0.00014542 | 0.006544636 | 1.616151051 | UP |
| APOL6 | 2.468944136 | 15.75826718 | 5.102657598 | 0.001487902 | 0.032105988 | -0.743728782 | UP |
| SLC9A1 | 2.44332713 | 10.66790489 | 5.213505464 | 0.001319137 | 0.030263301 | -0.619130523 | UP |
| IL2RA | 2.443167802 | 6.813704262 | 6.160439644 | 0.000502983 | 0.015433854 | 0.371176313 | UP |
| SEMA7A | 2.418569117 | 8.214975994 | 7.678605232 | 0.000131854 | 0.006251382 | 1.712516001 | UP |
| TDRD9 | 2.366793364 | 1.276296043 | 7.459276661 | 0.000157816 | 0.006981767 | 1.535419185 | UP |
| LAG3 | 2.34963287 | 6.0706445 | 5.326853472 | 0.001168333 | 0.027812483 | -0.493661207 | UP |
| GRASP | 2.301552934 | 2.952719835 | 7.07927231 | 0.000217707 | 0.008525459 | 1.215903234 | UP |
| SNAI1 | 2.26067724 | 1.718752104 | 6.98132737 | 0.000237054 | 0.009086419 | 1.130842007 | UP |
| SH3D21 | 2.230074383 | 2.469072615 | 6.19994455 | 0.000484288 | 0.015124134 | 0.409737686 | UP |
| ACAP1 | 2.212746903 | 5.318500065 | 5.178292811 | 0.001370316 | 0.03074946 | -0.658507007 | UP |
| CLCF1 | 2.191583376 | 3.423616715 | 9.184725056 | 4.26E-05 | 0.002770698 | 2.799415047 | UP |
| ELF4 | 2.16934358 | 7.579831255 | 6.091640968 | 0.000537507 | 0.016207639 | 0.303515444 | UP |
| RNF122 | 2.153302969 | 2.233486366 | 6.398890941 | 0.000401258 | 0.013247367 | 0.600763154 | UP |
| SLAMF1 | 2.137599438 | 4.264968755 | 7.423606716 | 0.000162563 | 0.007104065 | 1.50612051 | UP |
| PSAT1 | 2.106480043 | 1.996873636 | 9.565360807 | 3.28E-05 | 0.002337287 | 3.042242962 | UP |
| FAM129A | 2.080037654 | 18.26891263 | 4.735525171 | 0.002243909 | 0.042554305 | -1.170021364 | UP |
| SPINT1 | 2.02257 | 7.916644074 | 5.610628808 | 0.000868495 | 0.022971936 | -0.18798817 | UP |
| MECP2 | 2.00549179 | 5.92813963 | 8.233244817 | 8.52E-05 | 0.004561879 | 2.137912968 | UP |
| GPR82 | -2.000769136 | 3.307731512 | -9.422536657 | 3.61E-05 | 0.0024958 | 2.952496857 | DOWN |
| AASDHPPT | -2.001861173 | 12.83047104 | -5.085070749 | 0.001516828 | 0.032591983 | -0.763670912 | DOWN |
| MCM6 | -2.003525864 | 10.27961687 | -4.891702882 | 0.001879741 | 0.037858757 | -0.9860999 | DOWN |
| ARL5A | -2.010335327 | 3.754663469 | -5.561760211 | 0.000913331 | 0.024017409 | -0.239778333 | DOWN |
| COPZ2 | -2.024381852 | 4.239696852 | -4.88575434 | 0.001892343 | 0.037871976 | -0.993034928 | DOWN |
| CPNE3 | -2.076871086 | 14.80524917 | -5.258202537 | 0.001257218 | 0.029387072 | -0.569420622 | DOWN |
| SNX11 | -2.078279074 | 8.984590067 | -5.967206288 | 0.000606927 | 0.017883599 | 0.179489389 | DOWN |
| GPR65 | -2.097791185 | 8.762203658 | -5.205408526 | 0.001330714 | 0.030398079 | -0.628168128 | DOWN |
| CWC27 | -2.106645852 | 6.546386879 | -4.669111747 | 0.002421966 | 0.045129377 | -1.249398518 | DOWN |
| PPIC | -2.151312559 | 8.719255232 | -7.230358181 | 0.000191259 | 0.007828625 | 1.344912642 | DOWN |
| POLR3K | -2.182854877 | 13.31702877 | -5.884722997 | 0.000658478 | 0.018920571 | 0.096090861 | DOWN |
| CARD6 | -2.21926537 | 11.47582977 | -6.917369558 | 0.000250734 | 0.00952999 | 1.074680772 | DOWN |
| ELMOD2 | -2.243945136 | 6.085656924 | -5.749632781 | 0.000753867 | 0.020791107 | -0.042573466 | DOWN |
| CCNB1 | -2.272540392 | 5.330222357 | -7.585233897 | 0.000142266 | 0.0064985 | 1.637760275 | DOWN |
| RBBP7 | -2.311906049 | 16.36075093 | -4.810231265 | 0.002060771 | 0.040262928 | -1.081565358 | DOWN |
| ARSG | -2.335888765 | 1.629408169 | -10.87540647 | 1.43E-05 | 0.001287321 | 3.795145225 | DOWN |
| GTPBP8 | -2.344833074 | 2.342058366 | -5.80108178 | 0.000715822 | 0.020054987 | 0.01054284 | DOWN |
| TNFRSF21 | -2.345558457 | 8.745952243 | -7.375540093 | 0.000169216 | 0.007254648 | 1.466415846 | DOWN |
| CTR9 | -2.352093025 | 13.88216885 | -6.238247077 | 0.000466906 | 0.014977405 | 0.446924707 | DOWN |
| AIG1 | -2.406385287 | 2.677670522 | -7.410928895 | 0.000164288 | 0.007144965 | 1.495673187 | DOWN |
| ATG4C | -2.433830716 | 4.147244807 | -5.35057372 | 0.001139271 | 0.027451575 | -0.467650414 | DOWN |
| ETV5 | -2.465678284 | 5.597894469 | -5.447954965 | 0.001028134 | 0.026091657 | -0.361750691 | DOWN |
| PCYOX1 | -2.469249568 | 10.59459284 | -9.720283445 | 2.96E-05 | 0.002141424 | 3.137784146 | DOWN |
| PTAFR | -2.481950926 | 18.43134119 | -6.569645578 | 0.000342625 | 0.011784723 | 0.760587569 | DOWN |
| KLRC2 | -2.497869172 | 2.489257523 | -4.642719026 | 0.00249703 | 0.046192494 | -1.281136865 | DOWN |
| TLR7 | -2.515460895 | 4.823878241 | -7.901319326 | 0.000110325 | 0.005544445 | 1.887105538 | DOWN |
| SLC16A1 | -2.584180926 | 11.14693564 | -4.972714363 | 0.001717092 | 0.036025609 | -0.892204726 | DOWN |
| FLI1 | -2.665350086 | 7.709092197 | -7.238817151 | 0.000189889 | 0.007807884 | 1.352057686 | DOWN |
| PTGFRN | -2.687223364 | 6.81266913 | -12.82530124 | 4.84E-06 | 0.000599546 | 4.717615497 | DOWN |
| ATPIF1 | -2.748522531 | 17.80141969 | -5.362631688 | 0.001124807 | 0.02729612 | -0.45446055 | DOWN |
| TAF15 | -2.750769877 | 18.06075681 | -5.488743107 | 0.000985229 | 0.02524753 | -0.317815038 | DOWN |
| ENOPH1 | -2.79625142 | 18.75644525 | -5.132321431 | 0.001440495 | 0.031627956 | -0.710200318 | DOWN |
| DAPP1 | -2.81181 | 13.53800665 | -7.679811509 | 0.000131726 | 0.006251382 | 1.713475676 | DOWN |
| KLHDC2 | -2.822509938 | 11.72734364 | -5.111084601 | 0.00147426 | 0.032105988 | -0.734190118 | DOWN |
| S100B | -2.842647432 | 3.323683453 | -8.399313184 | 7.51E-05 | 0.004170319 | 2.259339289 | DOWN |
| OS9 | -2.859706667 | 33.27010051 | -8.080178783 | 9.59E-05 | 0.005014208 | 2.023620786 | DOWN |
| RGS18 | -2.909220675 | 3.336443553 | -7.614886099 | 0.000138862 | 0.006408891 | 1.661602124 | DOWN |
| STMN1 | -2.915663704 | 5.433518649 | -11.01489571 | 1.32E-05 | 0.001226372 | 3.868434862 | DOWN |
| CD93 | -2.935736259 | 3.019284944 | -13.57664311 | 3.32E-06 | 0.000460819 | 5.021185486 | DOWN |
| RCSD1 | -3.07464642 | 16.63458152 | -8.411696567 | 7.44E-05 | 0.004157206 | 2.268288384 | DOWN |
| HGSNAT | -3.109895309 | 16.88517992 | -6.649078029 | 0.000318687 | 0.011229908 | 0.833664331 | DOWN |
| MARCKSL1 | -3.134648641 | 14.64433453 | -7.048866212 | 0.000223516 | 0.008677789 | 1.18961816 | DOWN |
| DPCD | -3.162279321 | 5.9239157 | -4.603787079 | 0.002612505 | 0.047360161 | -1.328155673 | DOWN |
| PBXIP1 | -3.21332679 | 16.5716256 | -6.221757437 | 0.000474302 | 0.015107509 | 0.430939452 | DOWN |
| FOLR2 | -3.25106808 | 3.614555261 | -11.6936129 | 8.89E-06 | 0.000913966 | 4.208101566 | DOWN |
| FGD2 | -3.274275423 | 6.413073419 | -9.209586491 | 4.18E-05 | 0.002742932 | 2.81563608 | DOWN |
| HS3ST1 | -3.292379951 | 4.509222988 | -5.063763406 | 0.001552715 | 0.033205348 | -0.787895798 | DOWN |
| EMB | -3.293750324 | 6.492445622 | -11.97703723 | 7.60E-06 | 0.0008181 | 4.342065169 | DOWN |
| CCT2 | -3.31186716 | 20.42061141 | -6.794040209 | 0.000279701 | 0.010327262 | 0.964989283 | DOWN |
| PDCD1LG2 | -3.385422901 | 14.19029181 | -8.685119057 | 6.08E-05 | 0.003691307 | 2.462244984 | DOWN |
| PON2 | -3.438932152 | 4.894312657 | -7.403851376 | 0.000165261 | 0.007152868 | 1.48983309 | DOWN |
| PGM2 | -3.450409815 | 18.51291772 | -5.483681446 | 0.000990443 | 0.025309445 | -0.323253872 | DOWN |
| WSB2 | -3.458755957 | 45.58441077 | -5.192900901 | 0.00134882 | 0.030503575 | -0.642148524 | DOWN |
| CRTAP | -3.468530741 | 20.21632115 | -7.988175858 | 0.000103031 | 0.005265637 | 1.953803414 | DOWN |
| RTN3 | -3.54548537 | 19.19013724 | -7.307598724 | 0.000179153 | 0.007468274 | 1.409852524 | DOWN |
| DEF6 | -3.57108 | 9.054710617 | -4.685846237 | 0.002375669 | 0.044420469 | -1.229331741 | DOWN |
| SLC39A8 | -3.64210142 | 16.34166712 | -6.76295308 | 0.000287587 | 0.010490194 | 0.937046234 | DOWN |
| ANXA7 | -3.67221821 | 27.88685134 | -5.860285115 | 0.000674682 | 0.019259629 | 0.071198266 | DOWN |
| TOP2A | -3.713695432 | 7.382990926 | -13.83503932 | 2.93E-06 | 0.000420431 | 5.119806538 | DOWN |
| SLC37A2 | -3.732425309 | 31.94912484 | -9.302244889 | 3.92E-05 | 0.00261048 | 2.875641607 | DOWN |
| CMKLR1 | -3.740015741 | 9.552298169 | -6.227486031 | 0.000471717 | 0.015078288 | 0.436496954 | DOWN |
| PDK4 | -3.743006231 | 6.4734711 | -10.06834775 | 2.36E-05 | 0.001871036 | 3.345805785 | DOWN |
| PRPF39 | -3.823808439 | 6.591544362 | -5.49622742 | 0.000977575 | 0.025122574 | -0.309779985 | DOWN |
| PNN | -3.832565061 | 18.93535257 | -7.161095122 | 0.000202905 | 0.008206976 | 1.286098763 | DOWN |
| AP3B1 | -3.90249284 | 27.27908156 | -6.784868153 | 0.000282002 | 0.010369887 | 0.956757246 | DOWN |
| CD302 | -3.946379105 | 4.773143848 | -10.37687632 | 1.94E-05 | 0.001594669 | 3.522844168 | DOWN |
| CLNS1A | -3.975861111 | 29.98163344 | -5.859934324 | 0.000674917 | 0.019259629 | 0.070840334 | DOWN |
| GTF2A1 | -4.107848247 | 3.649848362 | -4.780349596 | 0.002131955 | 0.041296933 | -1.116841246 | DOWN |
| TMEM30A | -4.230752469 | 31.0666007 | -4.942078531 | 0.001776685 | 0.036862132 | -0.927592189 | DOWN |
| NIPSNAP3A | -4.288796667 | 15.54492115 | -6.43421258 | 0.000388258 | 0.012921147 | 0.634133187 | DOWN |
| SPG21 | -4.296582655 | 31.8391465 | -5.109081021 | 0.001477491 | 0.032105988 | -0.736457012 | DOWN |
| SERP1 | -4.364792654 | 37.82367492 | -4.707867835 | 0.002316233 | 0.043742464 | -1.202992579 | DOWN |
| TMEM37 | -4.482626235 | 4.937724516 | -7.24858675 | 0.000188321 | 0.007778755 | 1.360299592 | DOWN |
| PITHD1 | -4.500345679 | 23.00923733 | -8.691394433 | 6.05E-05 | 0.003691307 | 2.466616106 | DOWN |
| PRNP | -4.590474753 | 15.46847891 | -12.44687783 | 5.90E-06 | 0.000701804 | 4.554610626 | DOWN |
| NOP58 | -4.617816658 | 14.78179784 | -5.212109594 | 0.001321125 | 0.030263301 | -0.620687844 | DOWN |
| ALOX5AP | -4.677641914 | 16.69884652 | -6.589273345 | 0.000336527 | 0.011775558 | 0.778719187 | DOWN |
| DCAF12 | -4.764010679 | 18.33352877 | -7.126276257 | 0.00020906 | 0.008309993 | 1.256323187 | DOWN |
| CASP4 | -4.794270679 | 39.01679597 | -4.919238577 | 0.00182261 | 0.037301652 | -0.954069975 | DOWN |
| SERPINF1 | -4.809764105 | 11.29471118 | -9.94747867 | 2.55E-05 | 0.001937948 | 3.274587369 | DOWN |
| FCGR2B | -4.814579136 | 14.82609004 | -5.186243727 | 0.001358569 | 0.03064743 | -0.649599333 | DOWN |
| QARS | -4.848780864 | 54.82674733 | -6.390541214 | 0.000404402 | 0.013302624 | 0.592850971 | DOWN |
| CD180 | -5.063733236 | 15.14271394 | -8.161181852 | 9.01E-05 | 0.00479286 | 2.08439186 | DOWN |
| EIF5B | -5.079903889 | 18.16992376 | -8.265722188 | 8.31E-05 | 0.004496085 | 2.161868491 | DOWN |
| ADORA3 | -5.121146185 | 5.287092571 | -4.770215911 | 0.002156712 | 0.041421697 | -1.128836211 | DOWN |
| GIMAP8 | -5.294651074 | 13.10447713 | -6.479406699 | 0.00037231 | 0.01252013 | 0.676593798 | DOWN |
| TLR4 | -5.391210679 | 11.46928958 | -11.41838475 | 1.04E-05 | 0.00103321 | 4.073659386 | DOWN |
| SEC11C | -5.584181481 | 45.0420071 | -5.19876201 | 0.001340302 | 0.03046324 | -0.635594293 | DOWN |
| ME1 | -5.619777654 | 32.04732381 | -7.74834061 | 0.00012464 | 0.006061781 | 1.767741763 | DOWN |
| PARP1 | -5.776281481 | 24.67774389 | -13.54991871 | 3.36E-06 | 0.000460819 | 5.010822516 | DOWN |
| TM6SF1 | -5.893202284 | 16.83036543 | -6.211738182 | 0.00047886 | 0.015124134 | 0.421208846 | DOWN |
| ADCY7 | -5.898946914 | 36.56751776 | -14.98617375 | 1.72E-06 | 0.000293522 | 5.526582483 | DOWN |
| THBS1 | -5.923223942 | 12.86130136 | -11.05256168 | 1.29E-05 | 0.001211834 | 3.888014981 | DOWN |
| CD99 | -5.960486851 | 38.01034508 | -5.707164837 | 0.000786983 | 0.021442904 | -0.086703625 | DOWN |
| SLC9A9 | -5.974405864 | 13.96536565 | -10.60129318 | 1.69E-05 | 0.001440097 | 3.647469615 | DOWN |
| PPIG | -5.992602407 | 18.63202276 | -14.77067957 | 1.89E-06 | 0.000305977 | 5.454267405 | DOWN |
| NUP62 | -6.024164012 | 3.971234794 | -7.527550384 | 0.000149161 | 0.00667976 | 1.59110709 | DOWN |
| NRP1 | -6.08606358 | 37.95565058 | -7.598464682 | 0.000140735 | 0.00646239 | 1.648410204 | DOWN |
| TTC1 | -6.155734753 | 26.91791714 | -5.733963536 | 0.0007659 | 0.02105877 | -0.058825818 | DOWN |
| EIF3L | -6.197153673 | 47.78236745 | -5.217567049 | 0.001313372 | 0.030263301 | -0.61460085 | DOWN |
| ERCC5 | -6.281396235 | 12.59822745 | -5.352336922 | 0.001137143 | 0.027451575 | -0.465720333 | DOWN |
| GDE1 | -6.515768025 | 30.73543056 | -6.127448459 | 0.000519217 | 0.015761207 | 0.338811151 | DOWN |
| NEAT1 | -6.7343 | 73.18604671 | -4.702339122 | 0.002330998 | 0.04383827 | -1.209598041 | DOWN |
| ID3 | -7.065124894 | 16.34233028 | -6.36652042 | 0.000413603 | 0.013507059 | 0.570037995 | DOWN |
| GALNT1 | -7.135161482 | 31.54543016 | -6.303321289 | 0.000438957 | 0.014255702 | 0.509653903 | DOWN |
| SNX6 | -7.183029012 | 21.26216975 | -9.953900802 | 2.54E-05 | 0.001937948 | 3.278398364 | DOWN |
| MERTK | -7.308544321 | 15.74062101 | -12.38106337 | 6.11E-06 | 0.000705401 | 4.525530122 | DOWN |
| RPL17 | -7.361302778 | 48.08600113 | -5.785443465 | 0.000727154 | 0.020239482 | -0.005562253 | DOWN |
| CPSF3 | -7.479218395 | 23.94406481 | -4.892584399 | 0.001877881 | 0.037858757 | -0.985072667 | DOWN |
| GIMAP4 | -7.721183333 | 32.51226064 | -6.07587406 | 0.00054579 | 0.016348384 | 0.287918312 | DOWN |
| RASSF3 | -7.73079179 | 10.19285874 | -13.10967582 | 4.18E-06 | 0.000530234 | 4.835555698 | DOWN |
| YWHAE | -8.164360061 | 53.52142257 | -7.256469062 | 0.000187066 | 0.007762374 | 1.366941382 | DOWN |
| NKG7 | -8.22511119 | 16.11838311 | -6.023183563 | 0.000574525 | 0.017095887 | 0.235547422 | DOWN |
| PEBP1 | -8.396275926 | 82.14506523 | -4.850176467 | 0.001969702 | 0.038903761 | -1.034628766 | DOWN |
| PRDX3 | -8.4339 | 63.28090535 | -6.433536674 | 0.000388502 | 0.012921147 | 0.633496151 | DOWN |
| TNFAIP8L2 | -8.497688025 | 27.12610568 | -4.587828423 | 0.002661539 | 0.047911387 | -1.347498681 | DOWN |
| RAB32 | -8.666804321 | 45.06529815 | -6.743203845 | 0.000292726 | 0.010549794 | 0.919232427 | DOWN |
| IL10RA | -8.670246296 | 52.0286894 | -7.34949059 | 0.000172951 | 0.007310796 | 1.444790183 | DOWN |
| MS4A7 | -8.711969136 | 24.83381502 | -6.400989327 | 0.000400472 | 0.013247367 | 0.602750147 | DOWN |
| MS4A4A | -9.041269167 | 15.24934266 | -6.558202207 | 0.000346237 | 0.011863873 | 0.749993857 | DOWN |
| SLCO2B1 | -9.080773025 | 22.69294529 | -5.398658581 | 0.001082801 | 0.026835655 | -0.415181858 | DOWN |
| EIF3A | -9.384445062 | 64.36752984 | -5.960840025 | 0.000610741 | 0.017937532 | 0.173086368 | DOWN |
| GIMAP7 | -9.413852654 | 16.16483979 | -25.25256423 | 5.10E-08 | 2.72E-05 | 7.652372083 | DOWN |
| TLR2 | -9.665296914 | 54.78635432 | -7.126657835 | 0.000208992 | 0.008309993 | 1.256650259 | DOWN |
| NCF4 | -9.855768148 | 26.35736259 | -11.06539494 | 1.28E-05 | 0.001211834 | 3.89466596 | DOWN |
| RAC1 | -9.865196605 | 52.17743981 | -10.97373099 | 1.35E-05 | 0.001243887 | 3.846934292 | DOWN |
| DHRS7 | -9.876550309 | 51.50964825 | -7.956840398 | 0.000105598 | 0.005366492 | 1.929829252 | DOWN |
| OLFML2B | -10.28243747 | 17.46892887 | -11.72515632 | 8.74E-06 | 0.000908268 | 4.223232442 | DOWN |
| RGS10 | -10.5907821 | 44.77473683 | -6.894805568 | 0.000255771 | 0.009640418 | 1.054749998 | DOWN |
| BLVRA | -10.67743086 | 39.775657 | -4.584008045 | 0.002673427 | 0.047983779 | -1.352135239 | DOWN |
| DYNC1I2 | -10.91316481 | 34.42072058 | -5.202033717 | 0.001335573 | 0.030432218 | -0.631937964 | DOWN |
| ZFP36L1 | -11.08988827 | 61.30371224 | -12.26572102 | 6.49E-06 | 0.0007253 | 4.47402883 | DOWN |
| CRYL1 | -11.3842187 | 26.29845097 | -7.171732159 | 0.000201065 | 0.008192957 | 1.295167046 | DOWN |
| SOD1 | -11.53452963 | 78.97008724 | -5.177320542 | 0.00137176 | 0.03074946 | -0.659596936 | DOWN |
| SLC40A1 | -11.70286687 | 7.314322648 | -24.26676312 | 6.69E-08 | 3.03E-05 | 7.524965239 | DOWN |
| SSB | -11.74045926 | 35.46501049 | -7.029715101 | 0.000227264 | 0.008785602 | 1.173006696 | DOWN |
| TOMM7 | -11.81284605 | 97.50537922 | -5.800707194 | 0.000716091 | 0.020054987 | 0.01015748 | DOWN |
| WWP1 | -11.93409611 | 21.60244506 | -12.3759267 | 6.12E-06 | 0.000705401 | 4.523251147 | DOWN |
| ADI1 | -11.97249475 | 45.60052747 | -18.88524685 | 3.65E-07 | 9.99E-05 | 6.588610642 | DOWN |
| VSIG4 | -12.28744198 | 32.76987891 | -32.43240671 | 9.31E-09 | 1.20E-05 | 8.325054188 | DOWN |
| GPR34 | -12.89800417 | 12.78445289 | -19.01166011 | 3.48E-07 | 9.99E-05 | 6.61650855 | DOWN |
| RPL22 | -13.11471944 | 83.58572438 | -6.239007395 | 0.000466568 | 0.014977405 | 0.44766089 | DOWN |
| RGS2 | -13.14337728 | 22.82444636 | -20.39966012 | 2.17E-07 | 7.84E-05 | 6.901319029 | DOWN |
| LDHB | -13.14685818 | 58.93522937 | -8.011491232 | 0.000101167 | 0.005199755 | 1.971577055 | DOWN |
| SRP14 | -13.97403395 | 127.2070886 | -4.851642962 | 0.001966445 | 0.038903761 | -1.032910372 | DOWN |
| EIF3H | -14.31851605 | 98.02014712 | -4.896538796 | 0.001869565 | 0.037858757 | -0.980466101 | DOWN |
| HADHA | -15.08195247 | 89.95248621 | -5.136442342 | 0.001434043 | 0.031562911 | -0.705553246 | DOWN |
| IER2 | -15.5654359 | 8.879087601 | -5.842548348 | 0.000686722 | 0.019473622 | 0.053078624 | DOWN |
| CD14 | -16.25621617 | 39.55922062 | -8.463935946 | 7.16E-05 | 0.004065887 | 2.305881166 | DOWN |
| CPVL | -16.4243284 | 49.24283004 | -9.921951717 | 2.59E-05 | 0.001953954 | 3.259409134 | DOWN |
| UCP2 | -17.00411667 | 101.2757029 | -8.60357517 | 6.45E-05 | 0.003816415 | 2.405120796 | DOWN |
| TUBA1C | -18.00186481 | 207.4551407 | -4.896029713 | 0.001870633 | 0.037858757 | -0.981059005 | DOWN |
| ARL6IP5 | -18.0847463 | 126.6025988 | -4.77618893 | 0.002142082 | 0.041316141 | -1.121764153 | DOWN |
| GLIPR1 | -18.17053704 | 42.63118704 | -4.569137581 | 0.002720267 | 0.048618767 | -1.37020466 | DOWN |
| BTG2 | -18.17864259 | 93.76277983 | -5.903770332 | 0.000646151 | 0.018674397 | 0.115434255 | DOWN |
| SPARC | -18.57639414 | 94.44171101 | -15.63840326 | 1.29E-06 | 0.000244965 | 5.735527087 | DOWN |
| MAFB | -19.45848765 | 60.99747356 | -12.36442415 | 6.16E-06 | 0.000705401 | 4.518142919 | DOWN |
| MFSD1 | -19.56505679 | 78.41273992 | -5.497530985 | 0.000976249 | 0.025122574 | -0.308381345 | DOWN |
| KCTD12 | -20.06542889 | 54.23912653 | -10.83265607 | 1.47E-05 | 0.001287707 | 3.772435499 | DOWN |
| SAMSN1 | -21.04992222 | 59.65303621 | -5.16095193 | 0.001396331 | 0.030950962 | -0.677968165 | DOWN |
| GATM | -21.18764036 | 16.40973089 | -29.31432479 | 1.85E-08 | 1.68E-05 | 8.079110086 | DOWN |
| TPP1 | -21.99000617 | 247.1000681 | -5.953440756 | 0.000615207 | 0.018010221 | 0.165637279 | DOWN |
| FCGRT | -24.7257 | 77.0303784 | -8.148467552 | 9.10E-05 | 0.004811746 | 2.074896113 | DOWN |
| HCLS1 | -25.25630926 | 136.6973638 | -9.490627976 | 3.45E-05 | 0.002420001 | 2.995485047 | DOWN |
| ATP5O | -25.57569753 | 157.18942 | -5.791610669 | 0.000722661 | 0.020176517 | 0.000793197 | DOWN |
| MARCKS | -25.73637414 | 39.68295615 | -4.78329568 | 0.002124817 | 0.041246989 | -1.113357085 | DOWN |
| SNX2 | -25.83409815 | 73.91819486 | -12.70793006 | 5.14E-06 | 0.000628488 | 4.667812496 | DOWN |
| LACC1 | -26.69634198 | 36.23272315 | -21.00376758 | 1.78E-07 | 6.99E-05 | 7.013951486 | DOWN |
| C3AR1 | -26.88727346 | 87.16700329 | -13.30061271 | 3.80E-06 | 0.000505872 | 4.912638121 | DOWN |
| RPL11 | -30.68101852 | 303.4276019 | -5.606201447 | 0.000872453 | 0.02300937 | -0.192665819 | DOWN |
| FKBP1A | -30.91102438 | 36.38035792 | -10.65105778 | 1.64E-05 | 0.001410191 | 3.67464613 | DOWN |
| ADAMDEC1 | -31.37586729 | 137.7015897 | -5.645777551 | 0.000837769 | 0.02235534 | -0.150953823 | DOWN |
| TXNIP | -31.91178457 | 261.6531181 | -4.8506124 | 0.001968733 | 0.038903761 | -1.034117917 | DOWN |
| FOS | -32.07141636 | 43.24732932 | -13.24593064 | 3.91E-06 | 0.000512336 | 4.890732131 | DOWN |
| PFDN5 | -39.30006296 | 169.0590741 | -7.450325164 | 0.000158992 | 0.006981767 | 1.528079812 | DOWN |
| CCL7 | -40.59156667 | 117.0118891 | -8.457932964 | 7.19E-05 | 0.004065887 | 2.301574301 | DOWN |
| EVI2B | -43.94840741 | 168.2766337 | -5.452494013 | 0.001023257 | 0.026074323 | -0.35684915 | DOWN |
| PABPC1 | -44.56026049 | 206.0929778 | -8.131036627 | 9.22E-05 | 0.004848563 | 2.061851823 | DOWN |
| CD163L1 | -45.89509883 | 30.45742951 | -17.35003433 | 6.45E-07 | 0.000149583 | 6.220289797 | DOWN |
| S100A9 | -46.43846975 | 225.3345671 | -4.751611042 | 0.002203 | 0.042042898 | -1.150900455 | DOWN |
| STAB1 | -53.7165321 | 106.0267185 | -11.42324888 | 1.04E-05 | 0.00103321 | 4.076073647 | DOWN |
| CALR | -60.72492593 | 528.362 | -5.507484999 | 0.000966188 | 0.024971827 | -0.297709625 | DOWN |
| FPR3 | -64.28480864 | 259.3161739 | -10.381982 | 1.93E-05 | 0.001594669 | 3.525717717 | DOWN |
| CD163 | -70.68299167 | 69.8812499 | -11.82067564 | 8.28E-06 | 0.000871157 | 4.268710541 | DOWN |
| MPEG1 | -80.56218179 | 107.25661 | -42.59673683 | 1.45E-09 | 3.28E-06 | 8.834882625 | DOWN |
| F13A1 | -92.02818444 | 49.48733973 | -199.072331 | 3.77E-14 | 3.41E-10 | 9.63154643 | DOWN |
| RPS25 | -100.8640556 | 697.9700309 | -5.260693711 | 0.001253864 | 0.029384594 | -0.566659006 | DOWN |
| S100A4 | -109.6581111 | 616.7555062 | -16.34113189 | 9.64E-07 | 0.000198184 | 5.945048238 | DOWN |
| CYP1B1 | -116.381 | 449.4678704 | -6.701124909 | 0.000304025 | 0.010913535 | 0.88111587 | DOWN |
| NPC2 | -155.5462593 | 760.673321 | -5.802141667 | 0.000715061 | 0.020054987 | 0.011633101 | DOWN |
| TGFBI | -225.7857963 | 406.9238889 | -8.729270873 | 5.89E-05 | 0.003631325 | 2.492923689 | DOWN |
| CCL2 | -296.7389444 | 442.8401667 | -17.95109786 | 5.13E-07 | 0.000128889 | 6.371276514 | DOWN |
| TMSB4X | -413.166 | 1916.074342 | -24.65124381 | 6.01E-08 | 3.02E-05 | 7.575953162 | DOWN |
| FUCA1 | -1093.362333 | 1901.845938 | -20.25229601 | 2.27E-07 | 7.92E-05 | 6.872852055 | DOWN |

**Supplementary Table 2**. Top 20 biological processes of DEGs from the comparisons of UHMWPE and control group

| Term | Description | Genes | Gene counts | P-value |
| --- | --- | --- | --- | --- |
| GO:0016021 | Integral component of membrane | NRP1, CD40, GPR65, MS4A7, SLC2A1, SLC40A1, TMEM140, SLC2A5, TNF, ICAM1, MS4A4A, IL4I1, GLIPR1, SERP1, FCGRT, ARL6IP5, MFSD1, OLR1, SLC39A8, VSIG4, PTGFRN, EMB, CMKLR1, HGSNAT, LAG3, CD93, SLC30A5, TAP2, TAP1, EMP1, PDCD1LG2, F3, MPEG1, TM4SF1, TAPBP, EREG, TMEM37, MMP14, NPC1, SPINT1, TMBIM1, IL3RA, SLC9A9, TLR7, VDAC1, CD302, TNFRSF21, RNF122, TLR2, RTN3, SDC4, CD163L1, NPR1, PON2, INSIG1, ADCY3, FPR3, SLC1A5, ADCY7, GPR82, SLC9A1, APOL6, SLAMF9, NEU1, UCP2, CD300LB, SLAMF7, MGAT1, CD300LF, CD99, SEC11C, SLAMF1, PTPN1, PRNP, ATP8B4, CD163, SLC37A2, TMEM30A, KLRC2, RHBDD2, GALNT1, IL10RA, NKG7, G0S2, SLC16A10, AIG1, MERTK, TM6SF1, IGF2R, IL2RA, GPR183, ALOX5AP, TOMM7, SFXN3, EVI2B, LAT | 96 | 0.08581 |
| GO:0070062 | Extracellular exosome | YWHAE, BTG2, SLC2A1, PEBP1, SRP14, SLC2A5, ICAM1, STMN1, ARL6IP5, FLOT2, OLR1, ANXA7, PGM2, CPNE3, VSIG4, RPS11, NANS, ENOPH1, CCT2, DUSP3, WARS, GSTO1, SERPINF1, RPL22, PLAUR, RHOF, PDCD1LG2, F3, TUBA4A, FGR, NPC1, SPINT1, NPC2, TMBIM1, CHMP4B, TAGLN2, S100A4, VDAC1, KCTD12, PFN1, ALDOA, S100A9, GAPDH, ARL8A, PPIC, RTN3, SDC4, SRC, FAM129A, ATP5O, NDRG1, THBS1, LDHB, SNX2, NEU1, SPP1, MGAT1, CD14, GPC4, AASDHPPT, SLAMF1, PRNP, MARCKSL1, SLC37A2, SLC16A1, FUCA1, WWP1, PILRA, CP, IGF2R, PSMB8, PSMB9, SOD1, FKBP1A, MYO1E, MARCKS, GATM, P2RX4, SH3D21, PSAT1, QPCT, APOC1, EIF3H, CRYL1, TPP1, TGFBI, CALR, CPVL, PFKP, MYO1G | 90 | 2.82E-07 |
| GO:0005886 | Plasma membrane | RGS18, NRP1, NPR1, GPR65, PON2, FAM129A, DAPP1, ADCY3, ATP5O, NDRG1, LITAF, ADCY7, RGS2, RASSF3, FCGRT, RGS1, OLR1, ANXA7, CPNE3, PTGFRN, CD14, GRASP, ANKRD13A, PTPN1, PRNP, MARCKSL1, ATP8B4, CD93, IL10RA, ADRM1, PLAUR, EMP1, RHOC, F3, ETV5, SOD1, MMP14, SPINT1, ADI1, GPR183, CLNS1A, RGS10, CRYL1, VDAC1, GAPDH, TLR4 | 46 | 0.036619 |
| GO:0005615 | Extracellular space | NRP1, CXCL9, IL1RN, SPARC, ADM, TNF, CXCL5, ICAM1, MECP2, CCL7, CCL4, CCL3, SPP1, CCL2, CD14, ARSG, CCL24, CRTAP, CCL22, CCL20, SERPINF1, OSM, MERTK, F3, SOD1, EREG, SPINT1, IL1B, CLCF1, S100A4, TGFBI, CALR, ALDOA, S100A9 | 34 | 0.004242 |
| GO:0005829 | Cytosol | NRP1, SRC, SLC2A1, GIMAP4, SAMSN1, ZFP36L1, MECP2, RGS2, SNX2, RGS1, STMN1, UAP1L1, CCL3, ANKRD1, ANXA7, PGM2, CPNE3, NANS, DUSP3, WIPI1, SOD1, FKBP1A, QARS, CLNS1A, ATG4C, RGS10, CHMP4B, CALR, GAPDH, SPG21, PFKP | 32 | 0.017298 |
| GO:0016020 | Membrane | YWHAE, OGFR, PPP1R15A, SEMA7A, ITPRIP, RRAD, PNN, CCNB1, STMN1, NEU1, LONP1, RPS11, NOP58, PARP1, CEP350, SLC30A5, ELMOD2, GZMB, RAB32, MARCKS, DHRS7, ACAP1, P4HA1, EIF3L, EIF3H, ALDOA, PFN1, PFKP, EIF3A | 29 | 0.04285 |
| GO:0005887 | Integral component of plasma membrane | SLC16A1, CD72, GPR34, PTAFR, CD180, SLC2A1, PLAUR, FPR3, SLC16A10, SLC7A11, PILRA, SLC2A5, TNF, TM4SF1, ICAM1, P2RX4, NPC1, SLCO2B1, STAB1, C3AR1, TLR7, SLC39A8, TLR4, TNFRSF21 | 24 | 0.08219 |
| GO:0006954 | Inflammatory response | CCL24, CXCL9, CCL22, CCL20, PTAFR, CD180, FPR3, PTGS2, CXCL5, CCL7, IL2RA, CCL4, CCL3, C3AR1, CCL2, TLR7, CD14, TLR4, LAT, TNFRSF21, TLR2 | 21 | 7.53E-08 |
| GO:0005525 | GTP binding | EIF5B, RRAD, GIMAP4, GTPBP8, RHOF, RHOC, GIMAP7, GEM, TUBA4A, GIMAP8, RAB32, TUBA1C, RAC1, ARL5A, ARL8A | 18 | 0.002406 |
| GO:0005925 | Focal adhesion | YWHAE, NRP1, RPL22, PLAUR, PARVB, IGF2R, ICAM1, MMP14, MARCKS, NUMB, FLOT2, CPNE3, CALR, ITGA5, RPS11, PFN1, CD99 | 17 | 0.002103 |
| GO:0005783 | Endoplasmic reticulum | PPP1R15A, PRNP, CRTAP, TMEM30A, PTGS2, SERP1, NPC1, P4HA1, NPC2, ALOX5AP, APOC1, CASP4, ARL6IP5, TLR7, ITGA5, ARSG | 16 | 0.098261 |
| GO:0070374 | Positive regulation of ERK1 and ERK2 cascade | CCL24, NRP1, SEMA7A, JUN, CCL22, CCL20, SRC, ICAM1, CCL7, GPR183, CCL4, CCL3, CCL2, TLR4, SLAMF1 | 15 | 2.95E-06 |
| GO:0009897 | External side of plasma membrane | CD40, CXCL9, LAG3, SEMA7A, THBS1, TNF, ICAM1, IL2RA, CALR, ITGA5, GPC4, TLR4, SLAMF1 | 13 | 2.85E-04 |
| GO:0006955 | Immune response | CXCL9, CCL7, IL2RA, IL1B, OSM, CCL2, GZMB, THBS1, TNF, CXCL5, LAT, TNFRSF21 | 12 | 0.003208 |
| GO:0007186 | G-protein coupled receptor signaling pathway | RGS18, CCL24, CXCL9, CCL22, CCL7, CCL20, CCL4, CCL3, CCL2, RAC1, CXCL5 | 12 | 0.041893 |
| GO:0008285 | Negative regulation of cell proliferation | CYP27B1, JUN, IRF1, IL1B, NUP62, OSM, CYP1B1, ATF5, NDRG1, EREG | 11 | 0.024468 |
| GO:0003924 | GTPase activity | RAB32, TUBA1C, EIF5B, GTPBP8, RAC1, GIMAP7, TUBA4A, GEM | 10 | 0.013942 |
| GO:0070098 | Chemokine-mediated signaling pathway | CCL24, CXCL9, CCL22, CCL7, CCL20, CCL4, CCL3, CCL2, CXCL5 | 9 | 5.37E-06 |
| GO:0030593 | Neutrophil chemotaxis | CCL24, CCL22, CCL7, CCL20, IL1B, CCL4, CCL3, CCL2, S100A9 | 9 | 2.07E-05 |
| GO:0043547 | Positive regulation of GTPase activity | CCL24, CCL22, CCL7, CCL20, CCL4, CCL3, CCL2, RAC1 | 9 | 1.14E-04 |

Abbreviation: DEGs, differentially expressed genes.
